# Supplementary material for: Active Learning Not Associated with Student Learning in a Random Sample of College Biology Courses
Source: Atypon-hosted journal article supplement (doi:10.1187/cbe.11-07-0061), 2011-12-01
Supplement: combinedsupmats1.pdf [file combinedsupmats1.pdf]

Supplemental Online Materials

for

Active learning *not* associated with student learning in a random sample of college biology courses

T. M. Andrews<sup>1</sup>, M. J. Leonard<sup>2</sup>, C. A. Colgrove<sup>2</sup>, S. T. Kalinowski<sup>1</sup>

<sup>1</sup>Department of Ecology, Montana State University

<sup>2</sup>Department of Education, Montana State University

## Table of Contents

|                                                                                                                                                                                    |   |
|------------------------------------------------------------------------------------------------------------------------------------------------------------------------------------|---|
| <b>TABLE S1.</b> COMPARISONS BETWEEN MEAN TEST SCORES AND LEARNING GAINS BETWEEN COURSES USING PAPER AND ONLINE TESTING.....                                                       | 2 |
| <b>TABLE S2.</b> COMPARISONS BETWEEN MEAN TEST SCORES AND LEARNING GAINS BETWEEN COURSES OFFERING COURSE CREDIT TO LOG INTO THE TESTS AND COURSES NOT OFFERING COURSE CREDIT ..... | 3 |
| <b>TABLE S3.</b> PEARSON'S CORRELATION MATRIX FOR LEARNING GAINS ON THE CINS-ABBR                                                                                                  | 4 |
| <b>TABLE S4.</b> PEARSON'S CORRELATION MATRIX FOR LEARNING GAINS ON THE CHEETAH QUESTION.....                                                                                      | 5 |
| <b>TABLE S5.</b> COMPARISONS BETWEEN FULLY PARTICIPATING INSTRUCTORS AND PARTIALLY PARTICIPATING INSTRUCTORS, USING WELCH'S <i>T</i> -TESTS FOR CONTINUOUS DATA.....               | 6 |
| <b>TABLE S6.</b> COMPARISONS BETWEEN FULLY PARTICIPATING INSTRUCTORS AND PARTIALLY PARTICIPATING INSTRUCTORS, USING FISHER'S EXACT TESTS FOR COUNT DATA.....                       | 7 |
| <b>FIGURE S1.</b> SCATTERPLOTS OF FOUR CALCULATIONS OF LEARNING GAINS ON THE CHEETAH QUESTION AND ACTIVE LEARNING EXERCISES PER WEEK. ....                                         | 8 |

---

**Table S1.** Comparisons between mean test scores and learning gains between courses using paper and online testing

---

|                       | Means |        | Welch's <i>t</i> -statistic | <i>p</i> -value |
|-----------------------|-------|--------|-----------------------------|-----------------|
|                       | Paper | Online |                             |                 |
| CINS-abbr pre         | 5.54  | 5.32   | -0.91                       | 0.37            |
| CINS-abbr post        | 6.93  | 6.37   | -1.70                       | 0.10            |
| Cheetah pre           | 2.77  | 2.99   | 0.80                        | 0.43            |
| Cheetah post          | 3.06  | 3.35   | 1.15                        | 0.26            |
| CINS-abbr effect size | 0.57  | 0.46   | -1.20                       | 0.24            |
| Cheetah effect size   | 0.12  | 0.16   | 0.58                        | 0.57            |

---

---

**Table S2.** Comparisons between mean test scores and learning gains between courses offering course credit to log into the tests and courses not offering course credit

---

|                       | Means  |           | Welch's <i>t</i> -statistic | <i>p</i> -value |
|-----------------------|--------|-----------|-----------------------------|-----------------|
|                       | Credit | No credit |                             |                 |
| CINS-abbr pre         | 5.28   | 5.69      | 1.58                        | 0.12            |
| CINS-abbr post        | 6.31   | 7.11      | 2.33                        | 0.03            |
| Cheetah pre           | 2.94   | 3.12      | 0.52                        | 0.61            |
| Cheetah post          | 3.30   | 3.44      | 0.42                        | 0.68            |
| CINS-abbr effect size | 0.44   | 0.61      | 1.62                        | 0.12            |
| Cheetah effect size   | 0.15   | 0.13      | -0.39                       | 0.70            |

---

---

**Table S3.** Pearson's correlation matrix for learning gains on the CINS-abbr

---

|                                    | <b>Effect size</b> | <b>Average<br/>normalized<br/>gain</b> | <b>Percent<br/>change</b> | <b>Raw<br/>change</b> | <b>CINS-<br/>abbr<br/>pre-test</b> | <b>CINS-<br/>abbr<br/>post-test</b> |
|------------------------------------|--------------------|----------------------------------------|---------------------------|-----------------------|------------------------------------|-------------------------------------|
| <b>Effect size</b>                 | –                  |                                        |                           |                       |                                    |                                     |
| <b>Average<br/>normalized gain</b> | 0.95***            | –                                      |                           |                       |                                    |                                     |
| <b>Percent change</b>              | 0.92***            | 0.82***                                | –                         |                       |                                    |                                     |
| <b>Raw change</b>                  | 0.98***            | 0.95***                                | 0.95***                   | –                     |                                    |                                     |
| <b>CINS-abbr pre-<br/>test</b>     | 0.27               | 0.51*                                  | -0.03                     | 0.25                  | –                                  |                                     |
| <b>CINS-abbr post-<br/>test</b>    | 0.73***            | 0.88***                                | 0.5*                      | 0.73***               | 0.85***                            | –                                   |

---

\* $p < 0.05$ , \*\* $p < 0.01$ , \*\*\* $p < 0.001$

The Holm-Bonferonni method was used to calculate  $p$ -values.

---

---

**Table S4.** Pearson's correlation matrix for learning gains on the cheetah question

---

|                                    | <b>Effect size</b> | <b>Average<br/>normalized<br/>gain</b> | <b>Percent<br/>change</b> | <b>Raw<br/>change</b> | <b>Cheetah<br/>pre-test</b> | <b>Cheetah<br/>post-test</b> |
|------------------------------------|--------------------|----------------------------------------|---------------------------|-----------------------|-----------------------------|------------------------------|
| <b>Effect size</b>                 | –                  |                                        |                           |                       |                             |                              |
| <b>Average<br/>normalized gain</b> | 0.99***            | –                                      |                           |                       |                             |                              |
| <b>Percent change</b>              | 0.86***            | 0.79***                                | –                         |                       |                             |                              |
| <b>Raw change</b>                  | 0.99***            | 0.99***                                | 0.87***                   | –                     |                             |                              |
| <b>Cheetah pre-test</b>            | -0.24              | -0.14                                  | -0.62**                   | -0.27                 | –                           |                              |
| <b>Cheetah post-test</b>           | 0.27               | 0.37                                   | -0.17                     | 0.24                  | 0.87***                     | –                            |

---

\* $p < 0.05$ , \*\* $p < 0.01$ , \*\*\* $p < 0.001$

The Holm-Bonferonni method was used to calculate  $p$ -values.

---

---

**Table S5.** Comparisons between fully participating instructors and partially participating instructors, using Welch's *t*-tests for continuous data

---

|                                                             | Means |           | Welch's <i>t</i> -statistic | <i>p</i> -value |
|-------------------------------------------------------------|-------|-----------|-----------------------------|-----------------|
|                                                             | Fully | Partially |                             |                 |
| Weekly frequency of specific active learning exercises      | 8.03  | 5.14      | -1.64                       | 0.11            |
| Class size                                                  | 233   | 208       | -0.54                       | 0.59            |
| Years of teaching experience                                | 14.56 | 13.59     | -0.28                       | 0.78            |
| Hours of class time dedicated to teaching natural selection | 4.77  | 5.97      | 0.82                        | 0.42            |
| Proportion of students regularly attending class            | 0.79  | 0.78      | -0.32                       | 0.76            |

---

**Table S6.** Comparisons between fully participating instructors and partially participating instructors, using Fisher's exact tests for count data

|                             |                          | Counts |           | <i>p</i> -value |
|-----------------------------|--------------------------|--------|-----------|-----------------|
|                             |                          | Fully  | Partially |                 |
| Instructor position         | Tenure track             | 15     | 16        | 0.06            |
|                             | Non-tenure track         | 18     | 8         |                 |
| Institution type            | Private                  | 2      | 5         | 0.10            |
|                             | Public                   | 31     | 17        |                 |
| Sampling list               | Top 50                   | 10     | 5         | 0.76            |
|                             | Large state institution  | 23     | 17        |                 |
| General active learning use | Never (or almost never)  | 4      | 6         | 0.14            |
|                             | Once per week            | 9      | 9         |                 |
|                             | Once per class           | 8      | 3         |                 |
|                             | More than once per class | 12     | 3         |                 |



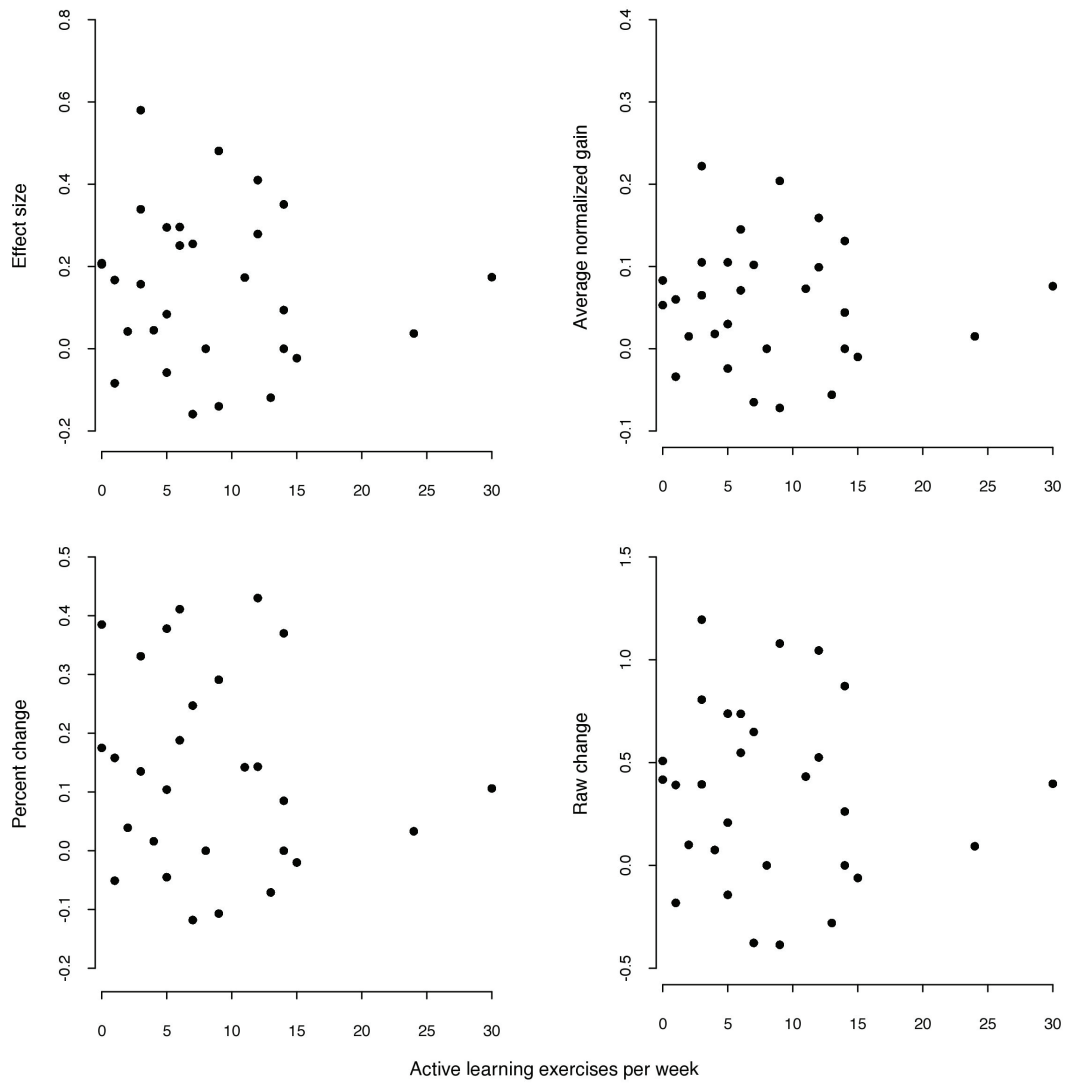

**Figure S1.** Scatterplots of four calculations of learning gains on the cheetah question and active learning exercises per week.

Relationship between instructor's use of active learning and four different calculations of learning gains on the cheetah question. The cheetah question was scored out of nine points, so a raw change of one is equivalent to earning one more point out of nine on the post-test than on the pre-test.
