# Supplementary material for: Active Learning Not Associated with Student Learning in a Random Sample of College Biology Courses
Source: Atypon-hosted journal article supplement (doi:10.1187/cbe.11-07-0061), 2011-12-01
Supplement: combinedsupmats5.pdf [file combinedsupmats5.pdf]

#### Appendix 4. Student post-test survey

1. How difficult was this course compared to other science classes you have taken?
  - a. much more difficult
  - b. more difficult
  - c. about the same as other classes
  - d. less difficult
  - e. much less difficult
  
2. How interesting was this course?
  - a. very interesting
  - b. interesting
  - c. average
  - d. uninteresting
  - e. very uninteresting
  
3. Richard Hake (1998) defines interactive engagement methods as "designed at least in part to promote conceptual understanding through interactive engagement of students in heads-on (always) and hands-on (usually) activities which yield immediate feedback through discussion with peers and/or instructors." Examples of these activities include group work, classroom discussions, in-class writing, and clicker questions that require deep thinking.  
*How often were active learning, interactive-engagement, or other student centered teaching activities used in the lecture portion of this course?*
  - a. Never (or almost never)
  - b. Once per week
  - c. Once per class
  - d. More than once per class
